# Supplementary material for: One-step synthesis of biocompatible magnetite/silk fibroin core–shell nanoparticles
Source: Royal Society of Chemistry journal article supplement (doi:10.1039/c4tb01125b), 2014-01-01
Supplement: c4tb01125b1.pdf [file c4tb01125b1.pdf]

## Electronic Supplementary Information (ESI)

### One-step synthesis of biocompatible magnetite/silk fibroin core shell nanoparticles

Wei Qin Sheng, ‡<sup>a</sup> Jing Liu, ‡<sup>b</sup> Shanshan Liu,<sup>a</sup> Qiang Lu,<sup>\*a</sup> David L Kaplan,<sup>a c</sup> Hesun Zhu<sup>d</sup>

<sup>a</sup>National Engineering Laboratory for Modern Silk & Collaborative Innovation Center of Suzhou Nano Science and Technology,

Soochow University, Suzhou 215123, People's Republic of China. Tel: (+86)-512-67061649; E-mail: Lvqiang78@suda.edu.cn

<sup>b</sup>Regenerative Medicine Center, First Affiliated Hospital of Dalian Medical University, No.222 Zhongshan Road, Dalian

116011, People's Republic of China

<sup>c</sup>Department of Biomedical Engineering, Tufts University, Medford, MA 02155, USA

<sup>d</sup>Research Center of Materials Science, Beijing Institute of Technology, Beijing, 100081, People's Republic of China

‡ These authors contributed equally to this work.

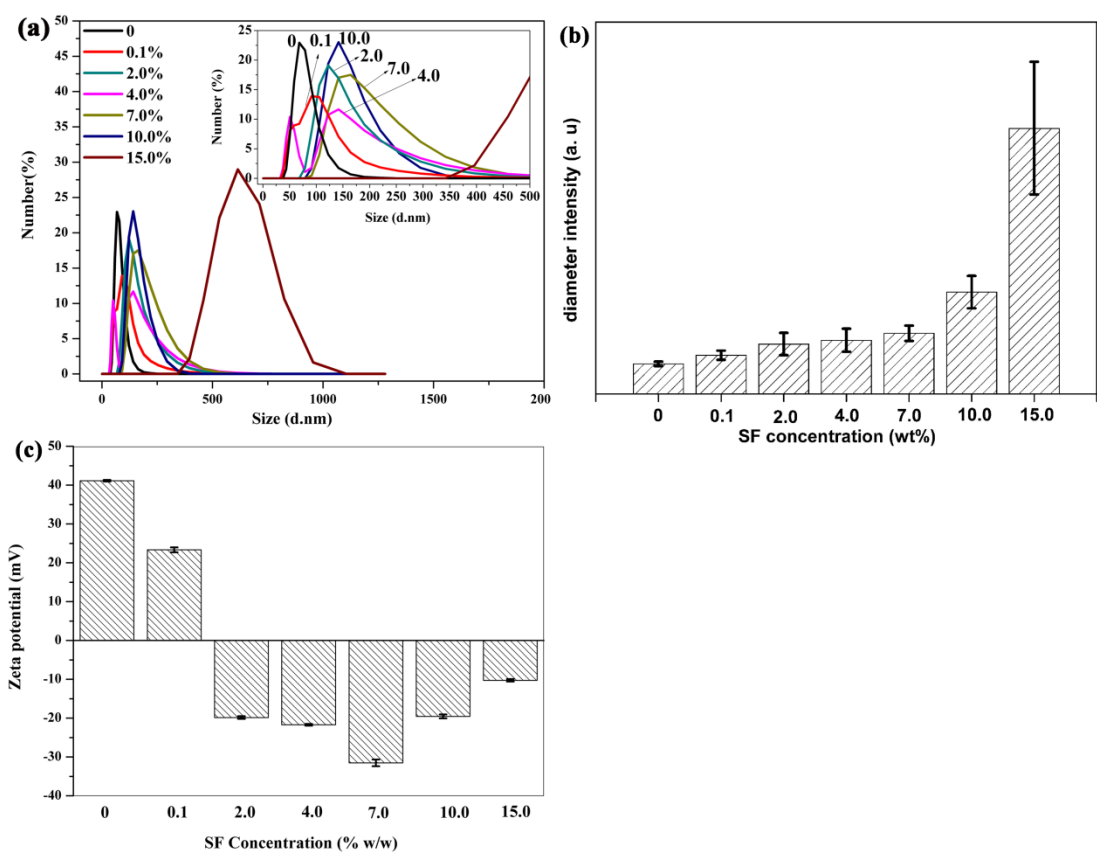

**Figure S1** Size distribution(a), Normalised diameter's histogram (b) and zeta potential (c) of Fe<sub>3</sub>O<sub>4</sub>/SF nanospheres prepared under different silk fibroin contents.

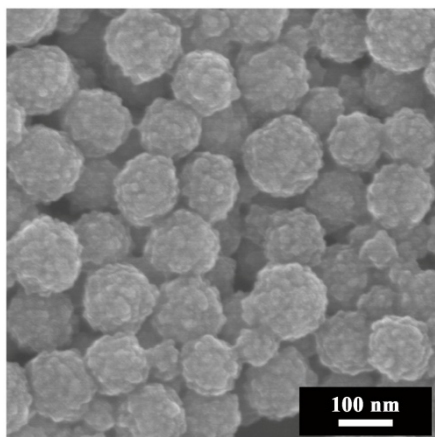

**Figure S2** High-magnification SEM image of the prepared  $\text{Fe}_3\text{O}_4/\text{SF}$  nanospheres when the concentration of silk fibroin was 7 wt%

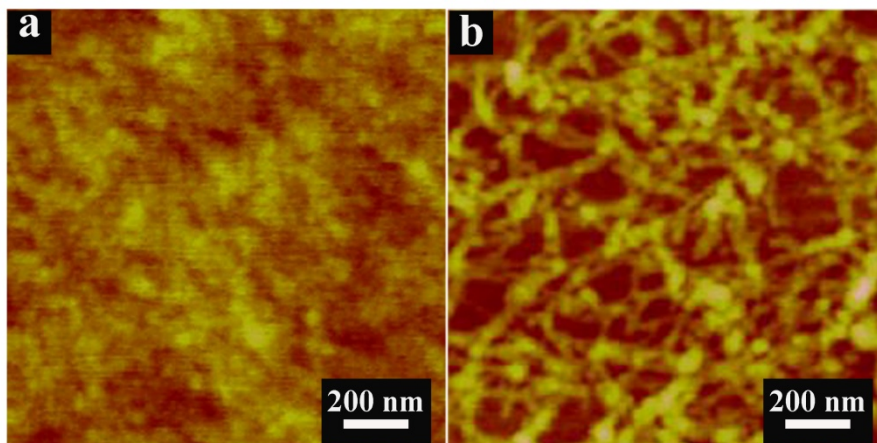

**Figure S3** the AFM images of the silk fibroin: (a) before addition of ethylene glycol (EG), and (b) after addition of EG. Silk fibroin changed from nanoparticles to nanofibers after the addition of ethylene glycol.

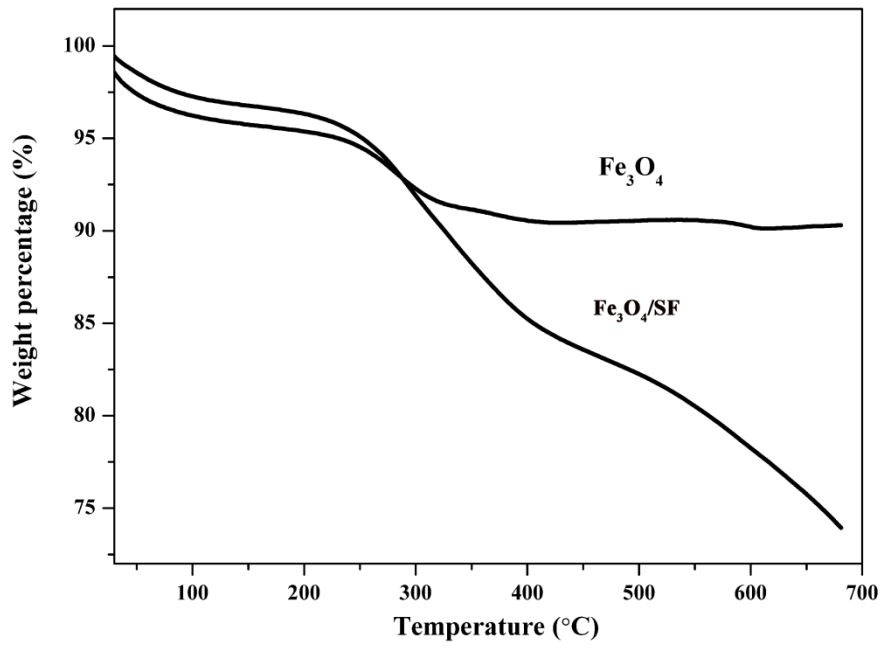

**Figure S4** TGA curves of the obtained  $\text{Fe}_3\text{O}_4/\text{SF}$  microspheres and pure  $\text{Fe}_3\text{O}_4$ .

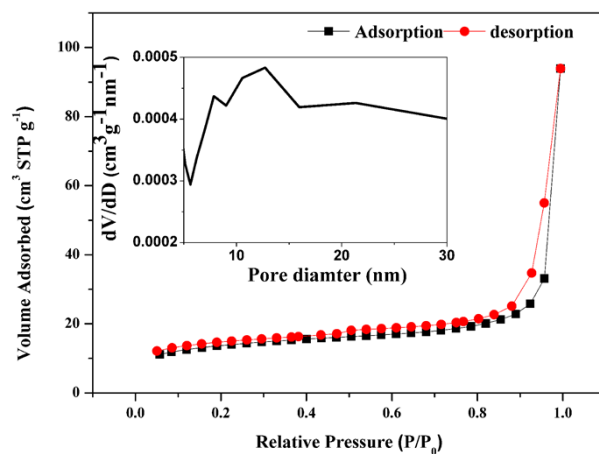

**Figure S5** Nitrogen adsorption-desorption isotherm curve of the obtained Fe<sub>3</sub>O<sub>4</sub>/SF microspheres. The concentration of SF that added in the reaction system is 7%.
